# Supplementary material for: Overexpression of ZNT1 and NRAMP4 from the Ni Hyperaccumulator Noccaea caerulescens Population Monte Prinzera in Arabidopsis thaliana Perturbs Fe, Mn, and Ni Accumulation
Source: MDPI journal article supplement (doi:10.3390/ijms222111896), 2021-11-02
Supplement: s1 [file s1]

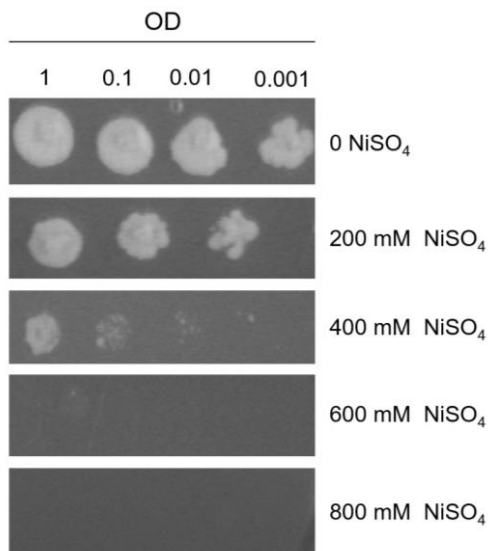

Figure S1: *Analysis of Ni tolerance and accumulation in yeast.* Ni minimum inhibitory concentration was determined in yeast cells transformed with the empty pADSL vector by spot assay. Yeast was grown overnight in 5 ml selective liquid YNB/G/W- at 28°C to early stationary phase. Yeast cells were then diluted to OD<sub>600 nm</sub> = 1, 0.1, 0.01 and 0.001 and spotted on YNB/G/W- plates supplemented with 0, 200, 400, 600, 800 μM NiSO<sub>4</sub>. The concentration of 400 μM NiSO<sub>4</sub> reduced the growth of yeast transformed with empty plasmid at 1 and 0.1 OD, and inhibited the growth of yeast at 0.01 and 0.001 OD, whereas higher concentrations completely abolished yeast growth.
